# Supplementary material
Source: publisher figshare collection journal article supplement (https://gsapubs.figshare.com/ndownloader/files/31855739)
Supplement: Supplementary file 1 [file 31855739]

## Sheet: C-MAP
sample #	age (Ma)	δ13C (‰)	Δleaf	MAP (mm)a	Error	MAP (%)b
B6-1-3	33.45	-30.9565	21.138	1329.84	27.678	37.3316
B6-1-2.5	33.4592	-31.1397	21.3311	1390.32	20.874	43.5086
B6-1-2	33.4627	-30.7341	20.9037	1260	32.9555	30.1952
B6-1-1.5	33.4703	-31.6077	21.8247	1557.64	36.6385	60.5836
B6-1-1	33.4758	-30.822	20.9963	1287.16	24.4009	32.9706
B6-2-4	33.4832	-31.0884	21.277	1373.11	27.769	41.7511
B6-2-3.75	33.4891	-31.4067	21.6126	1483.41	45.7655	53.0114
B6-3.5	33.4935	-31.5231	21.7354	1525.96	49.3871	57.3525
B6-2-3	33.5	-31.3399	21.5421	1459.53	30.3014	50.5745
B6-2-2.5	33.5082	-31.6368	21.8554	1568.7	52.2807	61.7113
B6-2-2	33.5153	-31.0235	21.2086	1351.64	56.1488	39.5591
B6-2-1.5	33.5271	-30.9639	21.1458	1332.23	11.3318	37.5757
B6-2-1	33.5376	-31.057	21.2439	1362.66	61.9527	40.6846
B6-3-4	33.55	-31.1231	21.3136	1384.71	23.4099	42.9365
B6-3-3.75	33.5588	-30.745	20.9152	1263.34	17.7487	30.5364
B6-3-3.5	33.5698	-30.9826	21.1655	1338.3	59.2354	38.196
B6-3-3	33.5822	-31.0531	21.2398	1361.39	10.4982	40.5548
B6-3-2.75	33.5919	-30.9405	21.1211	1324.68	45.4723	36.8045
B6-3-2.5	33.6	-30.8281	21.0027	1289.05	45.3883	33.164
B6-3-2	33.616	-30.975	21.1575	1335.82	33.0554	37.9428
B6-3-1.75	33.634	-31.1522	21.3443	1394.53	21.6213	43.9387
B6-3-1.5	33.65	-31.5694	21.7842	1543.2	61.711	59.1106
B6-3-1	33.6586	-31.1614	21.354	1397.65	22.1079	44.257
B6-4-5.5	33.6681	-30.9955	21.1791	1342.49	44.8626	38.6245
B6-4-5	33.6804	-31.2381	21.4348	1423.91	48.0302	46.939
B6-4-4.5	33.6909	-31.495	21.7058	1515.58	53.8652	56.2935
B6-4-4	33.7	-31.121	21.3113	1383.99	29.3359	42.8628
B6-4-3	33.7116	-30.8652	21.0417	1300.69	26.8467	34.3538
B6-4-2	33.7237	-30.065	20.1995	1071.39	12.5777	10.8985
B6-4-1	33.7299	-30.1884	20.3292	1103.88	20.7305	14.2258
B6-5-6	33.7344	-30.9661	21.1482	1332.95	50.4504	37.65
B6-5-5.75	33.7379	-31.033	21.2187	1354.77	44.7641	39.8783
B6-5-5.5	33.742	-31.0651	21.2525	1365.35	64.7365	40.9595
B6-5-5	33.75	-31.2398	21.4366	1424.48	71.6694	46.9972
B6-5-4	33.7519	-30.7554	20.9261	1266.51	22.6061	30.8602
B6-5-3.5	33.7544	-30.3185	20.4661	1139.23	27.9312	17.8429
B6-5-3	33.7569	-30.3771	20.5278	1155.54	39.5357	19.5121
B6-5-2.5	33.7591	-29.7801	19.8999	999.969	42.78	3.58298
B6-5-2	33.7622	-30.4361	20.5899	1172.17	28.439	21.2133
B6-5-1.5	33.7652	-30.3592	20.5089	1150.52	39.4802	18.9987
B6-5-1	33.7673	-30.0465	20.1799	1066.58	66.2459	10.4065
B6-5-0.5	33.769	-30.3379	20.4866	1144.61	64.2233	18.3936
B6-6-6	33.7712	-30.5952	20.7575	1218.28	27.6537	25.9293
B6-6-5.5	33.7736	-31.0344	21.2201	1355.21	25.5241	39.9237
B6-6-5	33.7764	-30.3795	20.5303	1156.2	22.3927	19.5793
B6-6-4.5	33.7791	-30.8117	20.9854	1283.92	8.73626	32.6401
B6-6-4	33.7813	-30.3391	20.4878	1144.94	31.8397	18.4277
B6-6-3.5	33.7838	-30.8246	20.999	1287.95	16.8963	33.0519
B6-6-3	33.7868	-30.4965	20.6535	1189.47	29.6192	22.9835
B6-6-2.5	33.7896	-30.364	20.514	1151.86	14.4609	19.1353
B6-6-2	33.7926	-30.6324	20.7966	1229.3	80.6577	27.0569
B6-6-1.5	33.7956	-30.4949	20.6518	1188.99	66.1044	22.934
B6-6-1	33.7975	-30.3113	20.4586	1137.25	16.6849	17.6407
B7-1-1	33.8	-30.1756	20.3158	1100.48	2.27014	13.8769
B7-2-1	33.8028	-30.2827	20.4285	1129.4	23.6389	16.8375
B7-2-2	33.805	-30.4283	20.5817	1169.97	43.2115	20.9885
B7-2-3	33.8075	-29.9971	20.1281	1053.92	31.9561	9.10951
B7-2-4	33.8105	-30.2152	20.3575	1111.09	19.8067	14.9634
B7-2-5	33.8132	-30.1497	20.2885	1093.58	14.6457	13.1713
B7-2-6	33.8146	-30.3259	20.474	1141.29	42.4424	18.0545
B7-3-1	33.8183	-30.428	20.5814	1169.86	29.9934	20.9777
B7-3-2	33.8221	-29.9686	20.098	1046.65	33.3285	8.36574
B7-3-3	33.825	-30.1064	20.2429	1082.17	13.7837	12.0025
B7-3-4	33.8287	-30.4353	20.5891	1171.95	5.24894	21.1909
B7-3-5	33.8327	-30.5925	20.7545	1217.46	12.6199	25.8454
B7-3-6	33.8348	-30.4939	20.6507	1188.71	10.3794	22.9051
B7-4-1	33.8409	-30.2457	20.3896	1119.32	15.8823	15.8061
B7-4-2	33.8462	-29.6538	19.7671	969.857	31.1306	0.496767
B7-4-3	33.85	-30.1752	20.3153	1100.36	13.5252	13.865
B7-4-4	33.8516	-29.915	20.0417	1033.17	29.788	6.98492
B7-4-5	33.8532	-30.1513	20.2902	1094.01	34.8575	13.2153
B7-4-6	33.854	-30.0938	20.2298	1078.89	15.2082	11.6666
B7-5-1	33.8558	-29.8679	19.9922	1021.46	6.44152	5.78498
B7-5-2	33.8582	-29.9805	20.1105	1049.68	19.439	8.6752
B7-5-3	33.8597	-29.7148	19.8312	984.29	35.1924	1.9761
B7-5-4	33.8613	-29.9635	20.0927	1045.37	27.0826	8.23391
B7-5-5	33.8632	-30.1733	20.3134	1099.87	45.7238	13.8147
B7-5-6	33.8639	-30.1699	20.3098	1098.96	19.4536	13.7213
B7-6-1	33.8659	-30.2079	20.3498	1109.12	26.9842	14.7622
B7-6-2	33.8735	-30.0566	20.1906	1069.21	33.9888	10.6757
B8-1-1	33.875	-29.945	20.0733	1040.71	20.1095	7.75662
B8-2-1	33.8833	-30.1381	20.2764	1090.52	67.648	12.858
B8-2-2	33.8894	-30.3464	20.4955	1146.98	14.1455	18.6361
B8-3-1	33.8935	-30.2929	20.4392	1132.18	115.449	17.1223
B8-4-1	33.9	-30.6111	20.7741	1222.96	38.8471	26.4086
B8-5-1	33.9058	-30.0406	20.1738	1065.07	38.0702	10.2514
B8-5-2	33.9143	-29.7874	19.9075	1001.74	74.1069	3.76423
B8-6-1	33.9208	-29.8367	19.9594	1013.76	6.86541	4.99634
B8-6-2	33.925	-29.9252	20.0524	1035.72	52.0641	7.24583
B9-1-1	33.9369	-30.165	20.3047	1097.66	20.6287	13.5883
B9-1-2	33.95	-29.8029	19.9238	1005.5	25.7184	4.15021
B9-2-1	33.9576	-29.7625	19.8814	995.716	14.5154	3.14711
B9-2-2	33.9664	-29.8151	19.9367	1008.48	15.0167	4.45549
B9-2-3	33.975	-29.8904	20.0159	1027.04	13.8921	6.35654
B9-3-1	33.9805	-30.2144	20.3566	1110.86	28.1263	14.9401
B9-3-2	33.9844	-29.7818	19.9017	1000.38	27.1485	3.62554
B9-4-1	33.9904	-29.6227	19.7344	962.584	11.5979	-0.248842
B9-4-2	33.9948	-30.1294	20.2672	1088.23	27.1913	12.6229
B9-5-1	34	-29.9278	20.0552	1036.37	12.3667	7.3126
B9-5-2	34.0078	-29.6953	19.8108	979.665	20.7041	1.50214
B10-2-1	34.012	-29.2536	19.3467	880.387	15.9986	-8.6792
B10-2-2	34.0164	-29.0219	19.1035	832.429	18.6456	-13.6019
B10-3-1	34.0207	-28.7895	18.8596	786.967	19.0981	-18.2711
B10-3-2	34.025	-28.8148	18.8861	791.798	31.9649	-17.7748
B10-4-1	34.0289	-29.5643	19.673	949.078	23.1209	-1.63344
B10-4-2	34.0323	-29.5184	19.6249	938.617	16.0761	-2.70613
B10-5-1	34.036	-29.7109	19.8271	983.348	9.99772	1.87962
B10-5-2	34.0388	-29.8938	20.0194	1027.87	21.8736	6.44172
B10-6-1	34.0467	-29.6115	19.7227	959.996	37.3379	-0.514121
B10-6-2	34.05	-30.3293	20.4775	1142.23	23.3257	18.1502
B11-1-1	34.0639	-29.6782	19.7928	975.615	30.4717	1.08697
B11-2-1	34.075	-29.529	19.6359	941.01	19.6646	-2.46073
B11-2-2	34.0868	-30.1034	20.2398	1081.4	12.2651	11.9235
B11-3-1	34.1	-29.5969	19.7073	956.599	14.0827	-0.862413
B11-3-2	34.105	-29.6988	19.8144	980.484	19.5664	1.58609
B11-4-1	34.1122	-30.0433	20.1767	1065.78	12.8402	10.3242
B11-4-2	34.1179	-29.8455	19.9686	1015.92	23.4639	5.21687
B11-5-1	34.125	-29.7831	19.903	1000.69	8.97062	3.6568
B11-5-2	34.1304	-29.8535	19.977	1017.89	20.1675	5.41891
	average (33.45-33.70 Ma)			1392.19
	average (34.00-34.13 Ma)			965.388
	increase (%)			44.21
a MAP: mean annual precipitation
b change in MAP is relative to the average MAP of the late Eocene (34.00-34.13 Ma)
